# Supplementary material for: Open sessile droplet viscometer with low sample consumption
Source: Royal Society of Chemistry journal article supplement (doi:10.1039/d0lc00248h), 2020-01-01
Supplement: d0lc00248h1.pdf [file d0lc00248h1.pdf]

## Electronic Supplementary Information

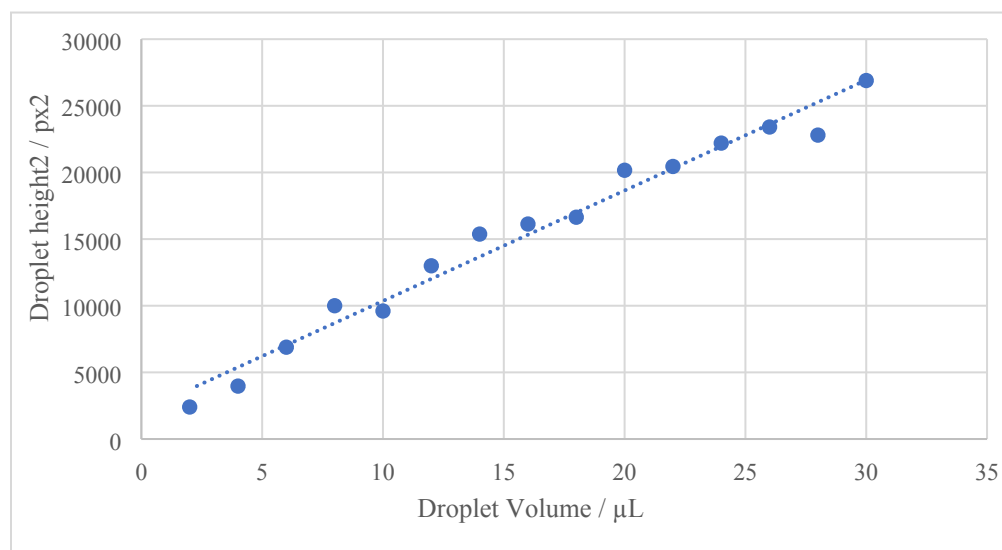

Figure S1: Calibration curve relating measured droplet height to droplet volume for droplets deposited on the centre patch of a three-reservoir design having a channel width of 500  $\mu\text{m}$  and a centre reservoir diameter of 1.5 mm.
